# Supplementary material
Source: PubMed Central journal article supplement (PMC3307651)
Supplement: supp_M020966_jlr.M020966-1.pdf [file supp_M020966_jlr.M020966-1.pdf]

Supplemental Table 1: QPCR primer pairs

| Gene             | Sense (5' – 3')             | Antisense (5' – 3')       |
|------------------|-----------------------------|---------------------------|
| Creb5            | CCAAGTCCAGCCAATGCAT         | GAGTCAGCGCAGCCTTCAGT      |
| Aqp1             | GGGCTGTGGTGGCTGAGTT         | AAGCCTAGGGCAGAACCAATG     |
| Fkbp9            | TGGCTGTGAGCTCGGAACTT        | ACCGTGCGCGGACACT          |
| Abcg2            | GCACCTCAACCTGCCATT          | TCAGGGTGCCCATCACAAC       |
| Snca             | AGTGGAGGGAGCTGGGAATATAG     | TCCTCACCCCTTGCCCATCT      |
| Gng12            | AGACTCATCAAAGATGTCCAGCAA    | TCCTGGCTTGGGCTATGC        |
| Il12rb2          | GCCTGCCCTGTGATTCC           | AGCCTTGCTTGGGATTCAAG      |
| Vamp8            | CAAGTGCTCCGAGACATGGA        | AGGTTCTAACTCGGTCATTTCC    |
| Retsat           | TCCTCCATTGCCCTTGAC          | CGGCAGAATGGAGAGAAACG      |
| Alms1            | GTGGAGCATCTGGGCAAGA         | CTTGATATGATGACTGCTGCCATAC |
| Mgl1             | CTGCAACACGTGGACACCAT        | GAGTGGCCAGGAGGAAGA        |
| Apobec1          | TGTTTATTTACATAGCACGGCTTTATC | TGCTAATAAGGTCCCTGAGTCCTT  |
| Fabp1 – Exon 1/2 | CCAGGAGAACTTTGAGCCATTC      | TGTCCTTCCCTTTCTGGATGA     |
| Fabp1 – Exon 3/4 | GGTGACAACTTTCAAAGGCATAAA    | TGTCGCCCAATGTCATGGTA      |
| Cnr1             | CTTAGACGGCCTTGACAGATACC     | GAATGTCATTTGAGCCCACGTA    |
| Cnr2             | GAGAACATGGCCGTGCTCTATAT     | GAACAGGTACGAGGGCTTTCTG    |
| Faah1            | CAGCATCCGGTTCCTTCT          | GCTGAGGCGGTTCCAGTA        |
| Naa              | CCTGGCTGACGGTATCTTGGT       | GGCCACAATACTGGTGCAGAA     |
| Napepld          | GAGAGGCTGGCTTACGAGTCA       | GAGCTCGTCCATTTCCACCAT     |
| Trpv1            | CCCTCTTGGTGGAGAATGGA        | CCCTTTGGTTTTCTTGAAGAAGTC  |
| PPAR alpha       | TATTCGGCTGAAGCTGGTGTAC      | CTGGCATTGTTCCGGTCT        |
| Cpt1a            | TGAGTGGCGTCCCTCTTTGG        | CAGCGAGTAGCGCATAGTCATG    |
| Acadm            | TGACGGAGCAGCCAATGA          | ATGGCCGCCACATCAGA         |
| Acadl            | GGCTGGTTAAGTGATCTCGTGAT     | ATGGGCAGGCGATCGA          |
| Ucp2             | TCACTGTGCCCTTACCATGCT       | AGGCATGAACCCCTTGTAGAAG    |
| Gapdh            | TGTGTCCGTCGTGGATCTGA        | CCTGCTTACCACCTTCTTGA      |

Supplemental Table 2: Informative Chromosome 6 Markers (C57BL/6 vs 129/SvJ)

| Marker   | Approx. Location (cM) | Forward                     | Reverse                      |
|----------|-----------------------|-----------------------------|------------------------------|
| D6Mit268 | 15.6                  | AGTCAGAATATGGCAAGTCAGTG     | TTTCAGAGTCTTTCTTTTCAGTATCTCC |
| D6Mit77  | 15.8                  | TGAGGTGCAAACAACACACA        | GCTGCCCTTAAAGACAGCAC         |
| D6Mit272 | 19.0                  | CTGACCTTAATGCTTGGAATCT      | ACTGTAACCTTATGTAAACTGGTGTGTG |
| D6Mit33  | 25.5                  | ACACATGTGCGCATAACACACACA    | TTTTATCTGGAAACCTATGGATT      |
| D6Mit94  | 29.0                  | AAGAGATCAGACAATGAAAGGTTG    | ACAAATTAACAACCTTACACCTTATGG  |
| D6Mit123 | 29.5                  | GGAAGGAGCAGGTCCAATAC        | CTCCAACCACCAAGACCTA          |
| D6Mit188 | 32.5                  | CTTTAGTCATTATTAGGATTGCCTATG | TGGGATAGCATTGGAAACGT         |
| D6Mit9   | 38.0                  | GTCTGTTTTGGCATATGGCA        | TCTGGGTANCCAACCATGTT         |
| D6Mit36  | 48.9                  | ACCATCTGCATGGACTCACA        | GTTGAAGAGGACGACCAAGTG        |
| D6Mit199 | 68                    | GCCCTTCCTACTCAAATAAATACC    | GGGTAGTTCAAATTAACCTGGG       |
| D6Mit373 | 77.7                  | TTCTGGGGTGAGAGGCAG          | AGAACATTGACAAAAAGTGATTGTG    |

Approximate marker location is listed in Centimorgans. Primer sequences are 5'→3'.
